# Supplementary material
Source: Springer Nature journal article supplement (https://www.springermedizin.de/resource/supplementary/13075_2013_4427_MOESM6_ESM.pdf/10110384)

**A****Day 3**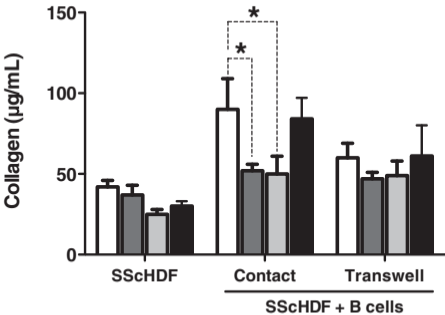**B****Day 5**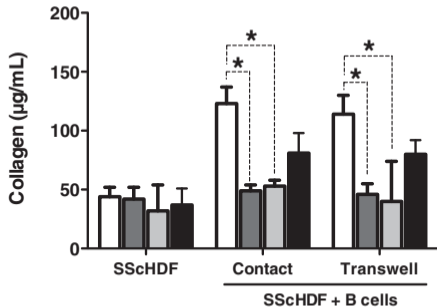

- Isotype control
- anti-TGF- $\beta$ 1 0,2 $\mu\text{g/mL}$
- anti-TGF- $\beta$ 1 1 $\mu\text{g/mL}$
- anti-IL-6

Supplement: MOESM6 [file 10110384]
